# Supplementary material for: A Central Edge Selection Based Overlapping Community Detection Algorithm for the Detection of Overlapping Structures in Protein–Protein Interaction Networks
Source: MDPI journal article supplement (doi:10.3390/molecules23102633), 2018-10-13
Supplement: s1 [file s1]

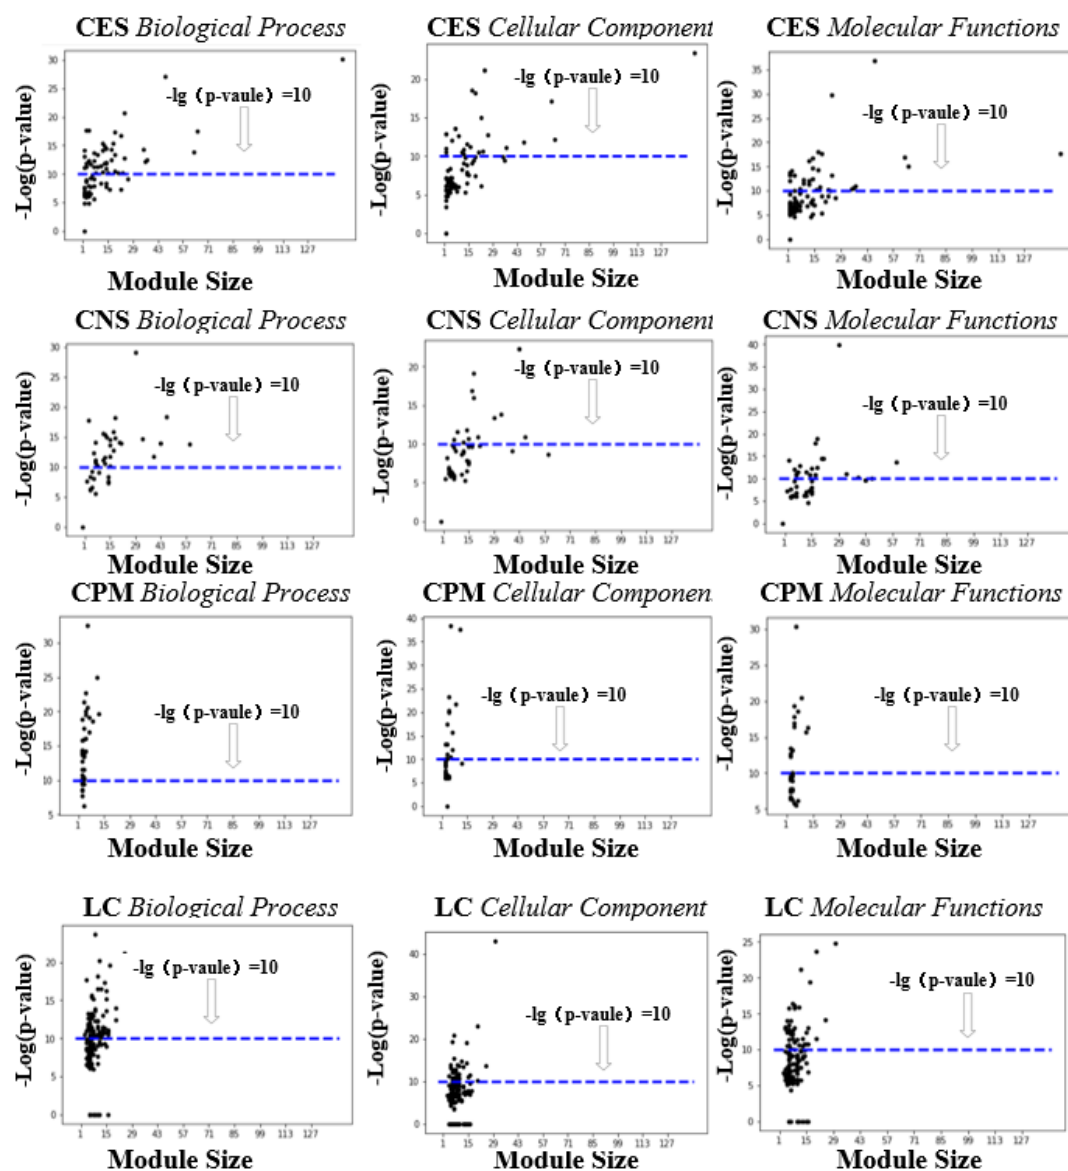

**Figure S1** Comparison of three levels on *M. musculus* Network

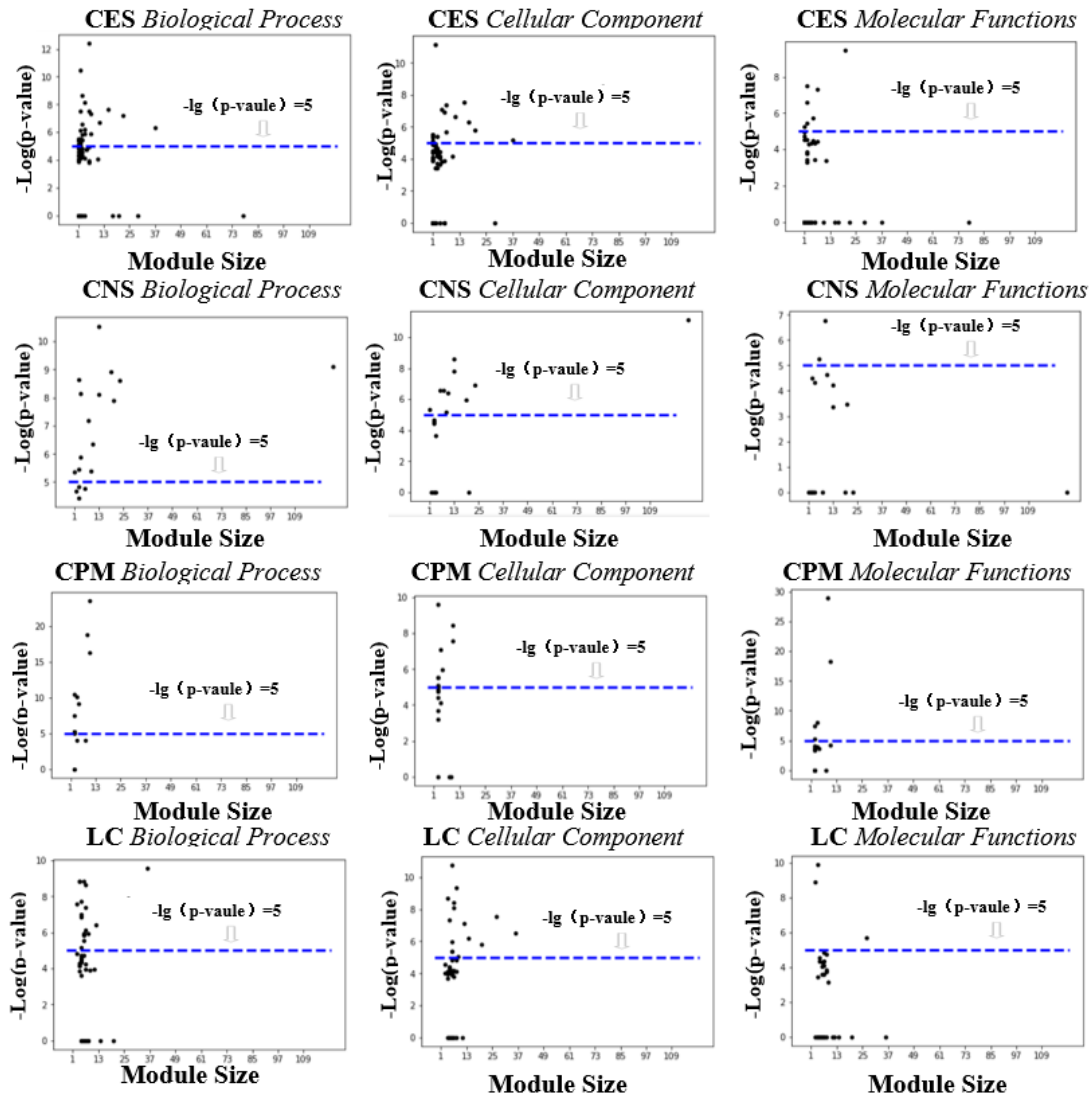

**Figure S2** Comparison of three levels on *E. coli* Network

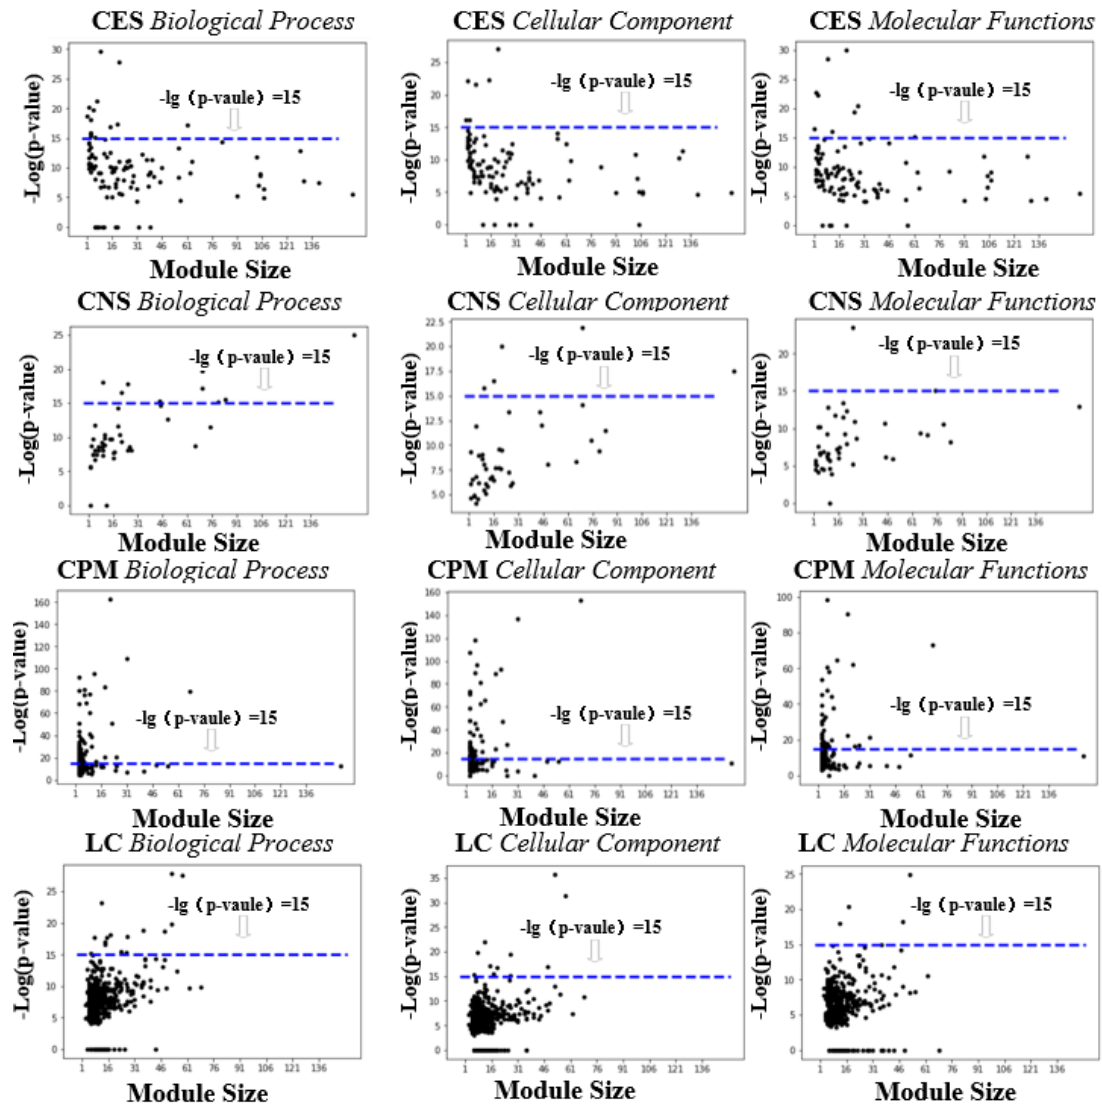

**Figure S3** Comparison of three levels on *Cerevisiae* Network
